# Supplementary material
Source: PubMed Central journal article supplement (PMC5610149)
Supplement: BPH-174-3608-s001.pdf [file BPH-174-3608-s001.pdf]

**Supporting information for**  
**Inhibition of Histone Deacetylases Sensitizes EGFR-TKI-Resistant Non-Small Cell Lung**  
**Cancer Cells to Erlotinib *In Vitro* and *In Vivo***

Weiwei Yu<sup>1,†</sup>, Weiqiang Lu<sup>1,†</sup>, Guoliang Chen<sup>1,†</sup>, Feixiong Cheng<sup>2,3</sup>, Hui Su<sup>1</sup>, Yihua Chen<sup>1</sup>,  
Mingyao Liu<sup>1,4</sup>, Xiufeng Pang<sup>1,\*</sup>

<sup>1</sup> Shanghai Key Laboratory of Regulatory Biology, Institute of Biomedical Sciences and School of Life Sciences, East China Normal University, Shanghai 200241, China;

<sup>2</sup> State Key Laboratory of Biotherapy/Collaborative Innovation Center for Biotherapy, West China Hospital, West China Medical School, Sichuan University, Chengdu, Sichuan 610041, China;

<sup>3</sup> Center for Cancer Systems Biology (CCSB), Dana-Farber Cancer Institute, Harvard Medical School, Boston, MA 02215, USA;

<sup>4</sup> Institute of Biosciences and Technology, Department of Molecular and Cellular Medicine, Texas A&M University Health Science Center, Houston, Texas 77030, USA.

To whom correspondence should be addressed:

Dr. Xiufeng Pang. Tel: +86-21-24206942; Fax: +86-21-54344922; E-mail:

[xfpang@bio.ecnu.edu.cn](mailto:xfpang@bio.ecnu.edu.cn).

† These authors contributed equally to this work.

Supplementary Figure 1

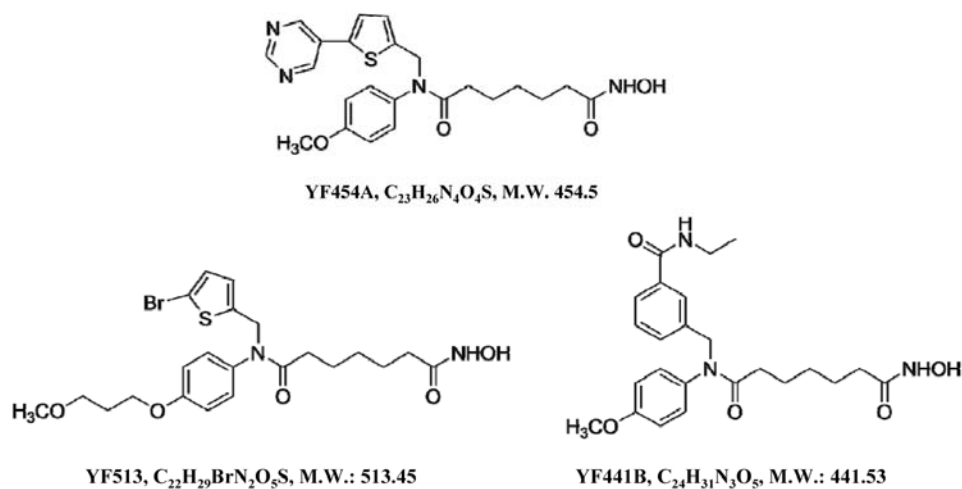

Supplementary Figure 1. Chemical structures of YF-454A, YF513 and YF441B.

Supplementary Figure 2

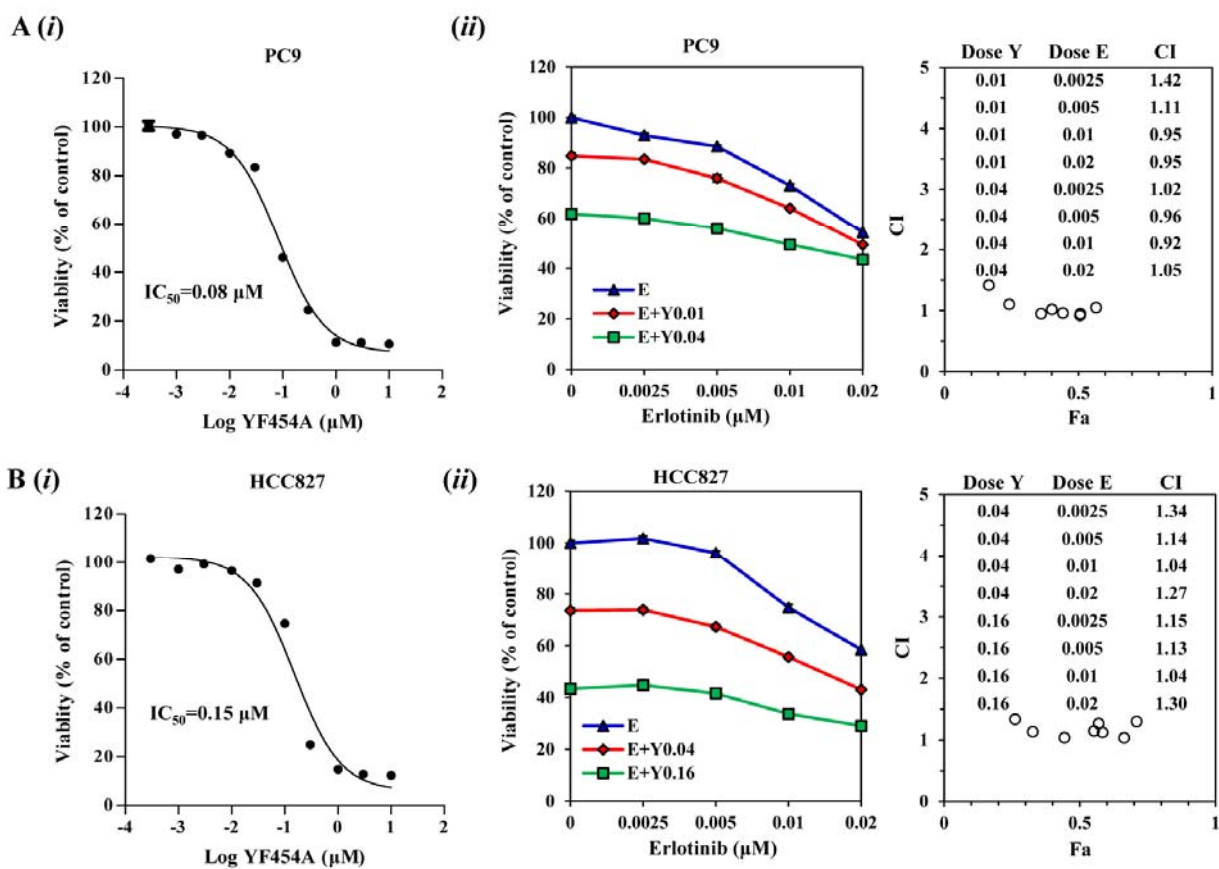

Supplementary Figure 2. YF454A and erlotinib are not synergistic in non-EGFR-TKI-resistant NSCLC cells. Non-EGFR-TKI-resistant NSCLC PC9 (A) and HCC827 (B) cells

were respectively treated with YF454A (Y) alone or in combination with erlotinib (E) for 72h. Cell viability was measured and IC<sub>50</sub>s of YF454A in PC9 [A(i)] and HCC827 [B(i)] cells were calculated. The interaction of the drug pair was analyzed using the CI equation and presented with Fa (fraction affected by the dose) in the Fa-CI plots [A(ii)] and [B(ii)]. CI values were calculated using the Calcsyn software package (Biosoft, Cambridge, UK). All results were represented as the mean ± SEM (n = 6 per group).

Supplementary Figure 3

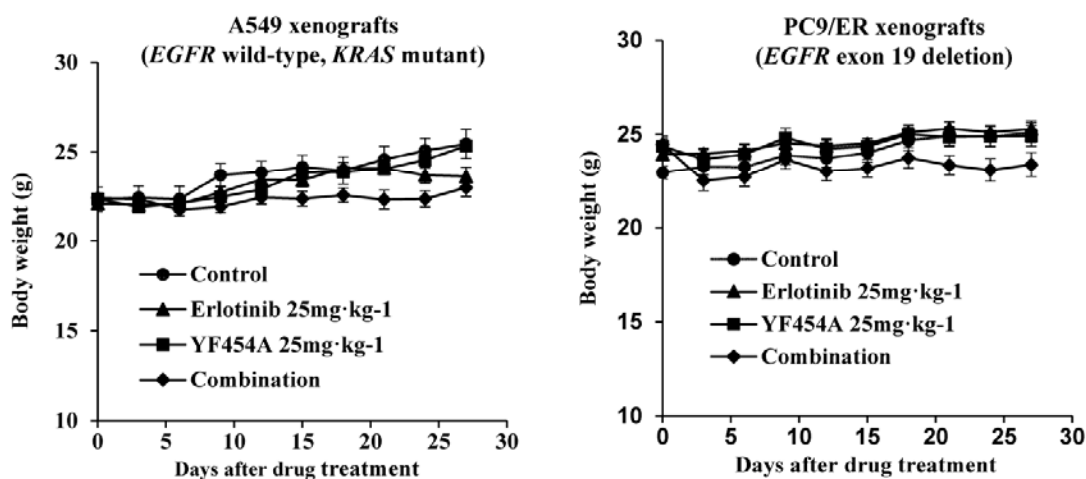

**Supplementary Figure 3. The combined treatment of YF454A and erlotinib has little effect on body weight in mice.** The mouse body weight was recorded every three days during treatments. *Dots*, mean; *bars*, SEM. In A549 xenograft mouse model, there were 8 mice in each treatment group. In PC9/ER xenograft model, there were 11 mice in the control group, Erlotinib group and YF454A group, and there were 10 mice in the combination group).

**Supplementary Table 1.** Sequence of primers for PCR amplification.

| Genes          | Forward (5'-3')      | Reverse (5'-3')       |
|----------------|----------------------|-----------------------|
| EGFR           | ACGAGTAACAAGCTCACGCA | CAGCTCCTTCAGTCCGGTTT  |
| HER2           | GGTGGTCTTTGGGATCCTCA | ACCTTCACCTTCCTCAGCTC  |
| AXL            | GGTGGCTGTGAAGACGATGA | CTCAGATACTCCATGCCA    |
| MET            | CCACCCTTTGTTCAGTGTGG | AGTCAAGGTGCAGCTCTCAT  |
| IGF1R          | GACAACCAGAACTTGCAGCA | CCCTTTAGTCCCCGTCCTT   |
| KAT2B          | GTCACCTGCCAGCAAAGAA  | CGCAGTCTTCGTTGAGATGG  |
| CCND1          | GCATGTTCGTGGCCTCTAAG | CGTGTTCGCGGATGATCTGT  |
| FOXA1          | AAGACTCCAGCCTCCTCAAC | CGTATGCCTTGAAGTCCAGC  |
| MCM7           | CATGCCTCTGATCATGTGCC | AGCACCGTGATACTACGAGG  |
| TIPIN          | GGAGAATGGCGTGATTGACC | TCAGGCTCAGTTCCTTCACC  |
| MSH6           | AATGCTGAAGAACGGAGGGA | TTCGTAATGCAAGGATGGCG  |
| SUV39H2        | GGCCACCTTCAGACTTCTA  | CCACGTCCATTGCTAGTTCG  |
| E2F3           | ATCCCTAAACCCGCTTCCAA | AGGGGAGGCAGTAAGTTCAC  |
| CHK1           | TCATGGCAGGGGTGGTTTAT | GTTGCCAAGCCAAAGTCTGA  |
| CDC25A         | CTACTGATGGCAAGCGTGTC | TACCCAGGCGATCTCTCTCT  |
| E2F1           | CTTCGTAGCATTGCAGACCC | GGAGATGATGGTGGTGGTGA  |
| RB             | TCACATTCCTCGAAGCCCTT | ACGGTCGCTGTTACATACCA  |
| P107           | GAGGTGGTGATCCGCTCAGA | TAGAGGAGACATTGGCATCAG |
| DP1            | AACTCGGCTCAGGAATGTCA | CGATGACCGTCTTCTTGCTG  |
| $\beta$ -Actin | GTACGCCAACACAGTGCTG  | CGTCATACTCCTGCTTGCTG  |

**Supplementary Table 2.** Cytotoxicity of novel HDAC inhibitors in EGFR-TKI-resistant NSCLC cells.

| Cell line | Characteristics                              | IC <sub>50</sub> ( $\mu$ M) |                 |                  |                  |                 |
|-----------|----------------------------------------------|-----------------------------|-----------------|------------------|------------------|-----------------|
|           |                                              | YF454A                      | YF513           | YF441B           | SAHA             | Erlotinib       |
| A549      | <i>EGFR</i> wild-type,<br><i>KRAS</i> mutant | 0.87 $\pm$ 0.11             | 4.46 $\pm$ 0.39 | 5.36 $\pm$ 0.19  | 5.34 $\pm$ 0.23  | >10             |
| H1299     | <i>EGFR</i> wild-type,<br><i>NRAS</i> (Q16K) | 3.50 $\pm$ 0.45             | 6.03 $\pm$ 0.84 | 10.06 $\pm$ 0.60 | 11.73 $\pm$ 0.86 | >10             |
| H1975     | <i>EGFR</i> (L858R,<br>T790M)                | 0.15 $\pm$ 0.02             | 0.73 $\pm$ 0.01 | 1.80 $\pm$ 0.14  | 1.59 $\pm$ 0.12  | >10             |
| PC9/ER    | <i>EGFR</i> exon 19<br>deletion              | 0.20 $\pm$ 0.02             | 1.78 $\pm$ 0.13 | 2.91 $\pm$ 0.05  | 4.25 $\pm$ 0.11  | 5.05 $\pm$ 0.48 |
| HCC827/ER | <i>EGFR</i> exon 19<br>deletion              | 0.21 $\pm$ 0.02             | 1.18 $\pm$ 0.09 | 1.80 $\pm$ 0.14  | 2.11 $\pm$ 0.25  | >10             |

Cytotoxicity of YF454A, YF513, YF441B, SAHA and erlotinib in EGFR-TKI resistant NSCLC cell lines was shown. The cytotoxicity of compounds was determined by the cell viability assays, and the IC<sub>50</sub> values were expressed as mean $\pm$ SEM. The mean of three independent experiments were shown ( $n = 3$  per

treatment group).

**Supplementary Table 3.** Genes that were significantly affected by the combined treatment of YF454A and erlotinib.

| <b>GO.ID</b> | <b>Term</b>                                      | <b>P-value</b> |
|--------------|--------------------------------------------------|----------------|
| GO:0006260   | DNA replication                                  | 4.95736E-07    |
| GO:0090304   | nucleic acid metabolic process                   | 5.11466E-07    |
| GO:0007049   | cell cycle                                       | 1.54993E-06    |
| GO:0022402   | cell cycle process                               | 2.17026E-06    |
| GO:0006974   | cellular response to DNA damage stimulus         | 3.92178E-06    |
| GO:0000278   | mitotic cell cycle                               | 3.99921E-06    |
| GO:0044770   | cell cycle phase transition                      | 4.29028E-06    |
| GO:0031570   | DNA integrity checkpoint                         | 5.32336E-06    |
| GO:1901576   | organic substance biosynthetic process           | 1.01810E-05    |
| GO:0044772   | mitotic cell cycle phase transition              | 1.06287E-05    |
| GO:0000077   | DNA damage checkpoint                            | 1.71877E-05    |
| GO:0006139   | nucleobase-containing compound metabolic process | 2.09767E-05    |
| GO:0009058   | biosynthetic process                             | 2.29972E-05    |
| GO:0009059   | macromolecule biosynthetic process               | 2.85468E-05    |
| GO:0000082   | G1/S transition of mitotic cell cycle            | 2.94935E-05    |

**Supplementary Table 4.** Differential expression analysis for five selected cell cycle-related genes.

| <b>Gene name</b> | <b>Differential expression</b> |                             | <b>Survival analysis</b> |                       |
|------------------|--------------------------------|-----------------------------|--------------------------|-----------------------|
|                  | <b>Log2 (fold change)</b>      | <b>Adjusted P-value (q)</b> | <b>HR</b>                | <b>P-value</b>        |
| <i>MSH6</i>      | 0.833                          | $7.9 \times 10^{-19}$       | 2.4 (1.86-3.1)           | $4.5 \times 10^{-12}$ |
| <i>MCM7</i>      | 1.37                           | $1.95 \times 10^{-24}$      | 2.05 (1.6-2.62)          | $4.8 \times 10^{-9}$  |
| <i>E2F3</i>      | 1.45                           | $2.82 \times 10^{-44}$      | 0.85 (0.67-1.07)         | 0.17                  |
| <i>TIPIN</i>     | 0.742                          | $2.10 \times 10^{-12}$      | 0.83 (0.65-1.04)         | 0.11                  |
| <i>SUV39H2</i>   | 1.42                           | $2.85 \times 10^{-33}$      | 0.99 (0.79-1.25)         | 0.949                 |

We performed differential expression analysis by using patient RNA-seq data from the Cancer Genome Atlas (<http://cancergenome.nih.gov>) and gene microarray expression data from GEO (<http://www.ncbi.nlm.nih.gov/geo/>).
